# Supplementary material for: Angiotensin II induces cholesterol accumulation and injury in podocytes
Source: PubMed Central journal article supplement (PMC5587570; doi:10.1038/s41598-017-09733-w), 2017-09-06
Supplement: 41598_2017_9733_MOESM1_ESM.pdf [file 41598_2017_9733_MOESM1_ESM.pdf]

**Angiotensin II induces cholesterol accumulation and injury in podocytes**

Yingjie Yang, Qian Yang, Jian Yang, Yiqiong Ma & Guohua Ding\*

Division of Nephrology, Renmin Hospital of Wuhan University, Wuhan, Hubei 430060,  
China

Correspondence and requests for materials should be addressed to Guohua Ding  
(ghxding@gmail.com)

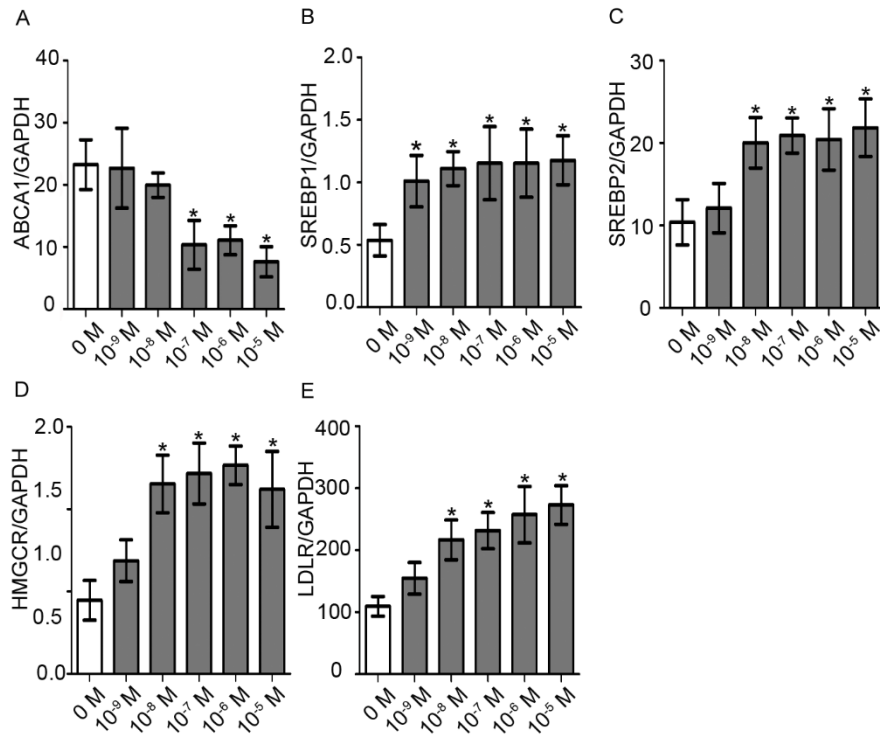

**Figure S1.** Quantitation of the Western blots of cholesterol metabolism-related molecules.

Podocytes were treated with various concentrations of AngII (10<sup>-9</sup>-10<sup>-5</sup>M) for 24 h. The histogram above represents the quantitation of the Western blots of cholesterol metabolism-related molecules. n = 3, \*p < 0.05 vs. the normal group. AngII decreased the protein level of ABCA1 but clearly increased the protein levels of SREBP1, SREBP2, HMGCR and LDLR.

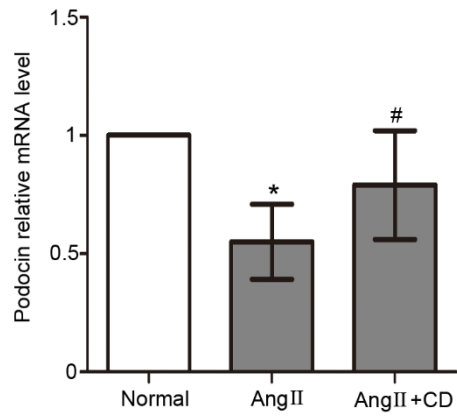

**Figure S2.** The effect of CD on podocin expression in podocytes.

Podocytes were pretreated with CD and then stimulated with Ang II . The graph shows quantitative analysis of the mRNA level of podocin.  $n = 3$ ,  $*p < 0.05$  vs. the normal group.  $\#p < 0.05$  vs. the Ang II group.

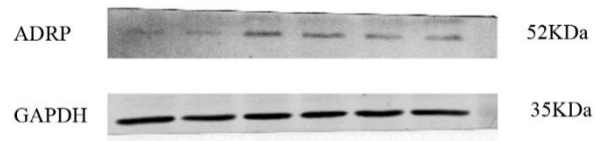

**Figure S3.** Full-length blots of Figure 2B.

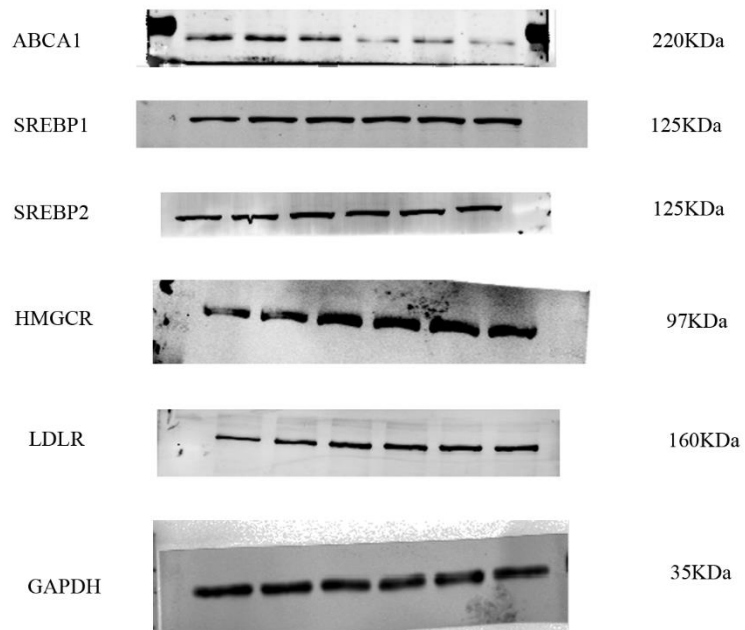

**Figure S4.** Full-length blots of Figure 4B.

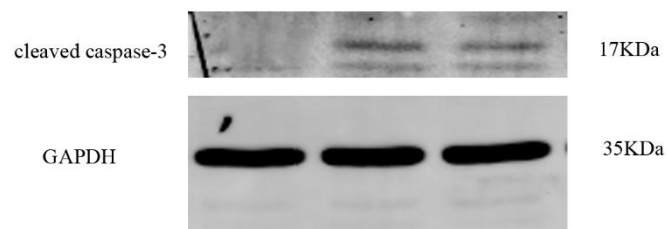

**Figure S5.** Full-length blots of Figure 5C.

**Supplementary Table 1.** Specificity and reactivity of antibodies used in the manuscript.

| <b>Antibody</b>   |                                | <b>Reactivity</b>                                                  |
|-------------------|--------------------------------|--------------------------------------------------------------------|
| ADRP              | guinea pig polyclonal antibody | Human, mouse, rat, dog, bovine                                     |
| ABCA1             | Mouse monoclonal antibody      | Human, mouse, rat, rabbit                                          |
| SREBP1            | Mouse monoclonal antibody      | Human, mouse, rat, canine, chicken, hamster, golden syrian hamster |
| SREBP2            | Mouse monoclonal antibody      | Mouse, rat, human                                                  |
| HMGCR             | Rabbit monoclonal antibody     | Mouse, rat, human                                                  |
| LDLR              | Rabbit polyclonal antibody     | Human, mouse, primate                                              |
| Cleaved caspase-3 | Rabbit monoclonal antibody     | Human                                                              |
| GAPDH             | Mouse monoclonal antibody      | Human, mouse, rat, rabbit                                          |
